# Supplementary material for: Isolation and Expression Analysis of STAT Members from Synechogobius hasta and Their Roles in Leptin Affecting Lipid Metabolism
Source: PubMed Central journal article supplement (PMC4813261; doi:10.3390/ijms17030406), 2016-03-22
Supplement: ijms-17-00406-s001.pdf [file ijms-17-00406-s001.pdf]

# Supplementary Materials: Isolation and Expression Analysis of STAT Members from *Synechogobius hasta* and Their Roles in Leptin Affecting Lipid Metabolism

Kun Wu, Xiao-Ying Tan, Chuan-Chuan Wei, Wen-Jing You, Mei-Qin Zhuo and Yu-Feng Song

**Table S1.** Protein ID numbers of target sequences in different species.

| Species                       | Isoform            | Protein ID         |
|-------------------------------|--------------------|--------------------|
| <i>Homo sapiens</i>           | STAT1              | ENST00000361099    |
|                               | STAT2              | ENST00000314128    |
|                               | STAT3              | ENST00000264657    |
|                               | STAT3 $\beta$      | ENST00000585517    |
|                               | STAT4              | ENST00000392320    |
|                               | STAT5A             | ENST00000345506    |
|                               | STAT5B             | ENST00000293328    |
|                               | STAT6              | ENST00000300134    |
| <i>Rattus norvegicus</i>      | STAT1              | ENSRNOT00000019465 |
|                               | STAT2              | ENSRNOT00000049536 |
|                               | STAT3              | ENSRNOT00000026760 |
|                               | STAT4              | ENSRNOT00000020032 |
|                               | STAT5A             | ENSRNOT00000026662 |
|                               | STAT5B             | ENSRNOT00000026354 |
|                               | STAT6              | ENSRNOT00000039306 |
| <i>Xenopus tropicalis</i>     | JAK1               | ENSXETT00000044013 |
|                               | JAK2               | ENSXETT00000001294 |
|                               | JAK3               | ENSXETT00000035893 |
|                               | TYK2               | ENSXETT00000025411 |
|                               | STAT1              | ENSXETT00000010105 |
|                               | STAT2              | ENSXETT00000047227 |
|                               | STAT4              | ENSXETT00000010124 |
|                               | STAT5B             | ENSXETT00000001864 |
| STAT6                         | ENSXETT00000009652 |                    |
| <i>Latimeria chalumnae</i>    | STAT3              | ENSLACT00000013753 |
| <i>Ciona intestinalis</i>     | STAT-A             | ENSCINT00000020503 |
|                               | STAT-B             | ENSCINT00000008341 |
| <i>Caenorhabditis elegans</i> | STAT               | Y51H4A.17a         |
| <i>Danio rerio</i>            | STAT1a             | ENSDART00000005720 |
|                               | STAT1b             | ENSDART00000145674 |
|                               | STAT2              | ENSDART00000148661 |
|                               | STAT3              | ENSDART00000104519 |
|                               | STAT4              | ENSDART00000105764 |
|                               | STAT5.1            | ENSDART00000024832 |
|                               | STAT5.2            | ENSDART00000124638 |
|                               | STAT6              | ENSDART00000023218 |

Table S1. Cont.

| Species                       | Isoform | Protein ID         |
|-------------------------------|---------|--------------------|
| <i>Oryzias latipes</i>        | STAT1   | ENSORLT00000000200 |
|                               | STAT2   | ENSORLT00000002051 |
|                               | STAT3   | ENSORLT00000005086 |
|                               | STAT4   | ENSORLT00000019022 |
| <i>Oreochromis niloticus</i>  | STAT1   | ENSONIT00000015373 |
|                               | STAT2   | ENSONIT00000024057 |
|                               | STAT3   | ENSONIT00000001452 |
|                               | STAT4   | ENSONIT00000021209 |
|                               | STAT5.1 | ENSONIT00000001431 |
|                               | STAT5.2 | ENSONIT00000009161 |
| <i>Takifugu rubripes</i>      | STAT6   | ENSONIT00000015034 |
|                               | STAT1   | ENSTRUT00000000223 |
|                               | STAT2   | ENSTRUT00000033362 |
|                               | STAT3   | ENSTRUT00000039373 |
|                               | STAT4   | ENSTRUT00000028160 |
|                               | STAT5.1 | ENSTRUT00000039672 |
| <i>Gasterosteus aculeatus</i> | STAT6   | ENSTRUT00000040273 |
|                               | STAT1   | ENSGACT00000020606 |
|                               | STAT2   | ENSGACT00000000913 |
|                               | STAT3   | ENSGACT00000011411 |
|                               | STAT4   | ENSGACT00000003538 |
|                               | STAT5.1 | ENSGACT00000011424 |
|                               | STAT5.2 | ENSGACT00000020355 |
|                               | STAT6   | ENSGACT00000011232 |

**Table S2.** Primers used for cDNA cloning and Q-PCR of genes from *S. hasta*.

| Gene    | Forward Primer (5'–3')             | Reverse Primer (5'–3')           | Step             | Size | Accession No. |
|---------|------------------------------------|----------------------------------|------------------|------|---------------|
| STAT1   | GTHATGAACATGGARGAGTCC              | AGWCGTCBGGDGACATBGGCAT           | Partial fragment | 1016 | KU532278      |
|         | TTCCTSMWVCARCACAACATC              | GCCTCCAGTCGGATGTCCAG             | Partial fragment | 1109 |               |
|         | GCCATACACGAAGAAGGAGC               | TACCGTCGTTCCACTAGTGATTT          | 3' RACE Outer    | 1321 |               |
|         | CTGAGAAGAGTGGCTACATGA              | CGCGGATCCTCCACTAGTGATTTCACTATAGG | 3' RACE Inner    | 1130 |               |
|         | CATGGCTACATGCTGACAGCCTA            | CTTTGCCACCACGTCCTGCC             | 5' RACE Outer    | 710  |               |
|         | CGCGGATCCACAGCCTACTGATGATCAGTCGATG | TCCCCCTCTTGCTCTGTACT             | 5' RACE Inner    | 448  |               |
|         | AGCTCAACATGCTGGCCGAC               | TCCATAGCCAGAACGGGAAC             | Q-PCR            | 126  |               |
| STAT2   | GGARGAGCAGCARGAYGAGTT              | CAGGCRCTYTGCTGCTGRCTGGAGTT       | Partial fragment | 897  | KU532280      |
|         | CAGAAGTGCGGAGGCGGAG                | CAYCAGCKTRSTTYTGATGTA            | Partial fragment | 861  |               |
|         | TGGGTCGAAACTACGCTCAC               | TACCGTCGTTCCACTAGTGATTT          | 3' RACE Outer    | 1728 |               |
|         | ATCCAAACACGCCCAAAGAG               | CGCGGATCCTCCACTAGTGATTTCACTATAGG | 3' RACE Inner    | 1574 |               |
|         | CATGGCTACATGCTGACAGCCTA            | GAGCTCCGATGCAGGACTTC             | 5' RACE Outer    | 915  |               |
|         | CGCGGATCCACAGCCTACTGATGATCAGTCGATG | CTGATTCACAAGAGACTGGAGG           | 5' RACE Inner    | 779  |               |
|         | ATGCTCAGCCTCGACACCA                | TTGCTCTTCATTCAATCCGACT           | Q-PCR            | 129  |               |
| STAT3   | CAGCAYCTRCARAGCAAGTA               | GTTVGAYTCYTCCATGTTTCAT           | Partial fragment | 942  | KU532281      |
|         | GGTGAAGTTTCCAGAGCTGA               | TSDGCBTCRKTGTGCATCAG             | Partial fragment | 1239 |               |
|         | CCGACATCATCATGGGCTAC               | TACCGTCGTTCCACTAGTGATTT          | 3' RACE Outer    | 1494 |               |
|         | GCCGTATTTGAAGACCAAGTTC             | CGCGGATCCTCCACTAGTGATTTCACTATAGG | 3' RACE Inner    | 1325 |               |
|         | CATGGCTACATGCTGACAGCCTA            | AGTIGAGCCATTTTCTGTCCG            | 5' RACE Outer    | 835  |               |
|         | CGCGGATCCACAGCCTACTGATGATCAGTCGATG | CTTCTCGGTGACCACTGTCC             | 5' RACE Inner    | 641  |               |
|         | ACATGCTAACAAACCACCCGA              | ACTGCCAGCTCAGGACCTCA             | Q-PCR            | 93   |               |
| STAT3-1 | GAGCCAGACATGGTAGGAGG               | AGATCGCTGTCCGGTAGGTC             | Q-PCR            | 116  | KU532281      |
| STAT3-2 | TGCGTTACCCCAAAATTC                 | TCGTTGTGCATGAGCGAGT              | Q-PCR            | 83   | KU532282      |
| STAT4   | ACAARACNTHCAGTCTCGAG               | TTRTAGTCYCGRATKATGTC             | Partial fragment | 1417 | KU532283      |
|         | GACTTTCAGGTGTCCTGGTC               | TACCGTCGTTCCACTAGTGATTT          | 3' RACE Outer    | 1077 |               |
|         | AGCCGGGACTTTCCTCCT                 | CGCGGATCCTCCACTAGTGATTTCACTATAGG | 3' RACE Inner    | 893  |               |
|         | CATGGCTACATGCTGACAGCCTA            | GTTCTGCAGTTGTTCCAGGC             | 5' RACE Outer    | 917  |               |
|         | CGCGGATCCACAGCCTACTGATGATCAGTCGATG | CTATGTCCATCTTAGACAGG             | 5' RACE Inner    | 792  |               |
|         | TGGTCATCTCCAACGTGAGC               | CAACTCAGAACCTCCGACAGC            | Q-PCR            | 145  |               |

Table S2. Cont.

| Gene            | Forward Primer (5'–3')             | Reverse Primer (5'–3')           | Step             | Size | Accession No. |
|-----------------|------------------------------------|----------------------------------|------------------|------|---------------|
| <i>STAT5.1</i>  | GACCGVCAGCTMMGRGAGCC               | TRGMRAAVACCTCATCYTTGG            | Partial fragment | 1468 | KU532284      |
|                 | AACAGCACTGGAACGATGGT               | TACCGTCGTTCCACTAGTGATT           | 3' RACE Outer    | 1229 |               |
|                 | CAGGGGAGAGGATGGTGTGG               | CGCGGATCCTCCACTAGTGATTTCACTATAGG | 3' RACE Inner    | 1070 |               |
|                 | CATGGCTACATGCTGACAGCCTA            | TCTCTGCCAACTTCTCACAC             | 5' RACE Outer    | 1033 |               |
|                 | CGCGGATCCACAGCCTACTGATGATCAGTCGATG | AGCTGCAGGGTTTTCTGGTG             | 5' RACE Inner    | 896  |               |
|                 | GAAAGCAGCGGGGACATTC                | ACTCCGCTCCTCGTCGAT               | Q-PCR            | 130  |               |
| <i>STAT5.2</i>  | CARCACDYTRCAGAARTACAG              | ARRTGGTTCAGRTCAGTACTGAT          | Partial fragment | 1353 | KU532285      |
|                 | GCAATGGTTTGAGGGAGTTGT              | TACCGTCGTTCCACTAGTGATT           | 3' RACE Outer    | 1023 |               |
|                 | AGATTGGCGGCATCACCATC               | CGCGGATCCTCCACTAGTGATTTCACTATAGG | 3' RACE Inner    | 868  |               |
|                 | CATGGCTACATGCTGACAGCCTA            | GGCAGAAATGATGTCCGTGA             | 5' RACE Outer    | 1106 |               |
|                 | CGCGGATCCACAGCCTACTGATGATCAGTCGATG | CCAGTTTCTCACACCAGGAC             | 5' RACE Inner    | 975  |               |
|                 | TCGGGTGCCTTTCATTGTC                | TGGGTTATTACTGGTGCTGCTA           | Q-PCR            | 160  |               |
| <i>STAT6</i>    | MRGATGAAGCTSDTGCAGAT               | GTYAGMTCCATBRCTCCCTC             | Partial fragment | 1400 | KU532286      |
|                 | TCAATGCTATGGCCACAGTTC              | TACCGTCGTTCCACTAGTGATT           | 3' RACE Outer    | 1161 |               |
|                 | CTACAACCTGCTGTTTCTGGC              | CGCGGATCCTCCACTAGTGATTTCACTATAGG | 3' RACE Inner    | 1007 |               |
|                 | CATGGCTACATGCTGACAGCCTA            | CAGACCCCTGTGGTGCCATT             | 5' RACE Outer    | 1000 |               |
|                 | CGCGGATCCACAGCCTACTGATGATCAGTCGATG | GTGATCTCTGGAGCTGTGGG             | 5' RACE Inner    | 878  |               |
|                 | CACAAAGCTGCCATCGGACA               | ACCAAATACACCTCCTGACGC            | Q-PCR            | 110  |               |
| <i>LepR</i>     | CCTCAAAACAGCCAAGCACC               | CGCTCTGAGGCTGGTATCTG             | Q-PCR            | 166  | KU359049      |
| <i>CPT1</i>     | CGCTCCTGCTCCAATGAGA                | GAGACCACATAGAGGCAGAAGA           | Q-PCR            | 173  | KJ508197      |
| <i>6PGD</i>     | CTGCTGCTGGACTCCTTCTT               | GTTGTGTCTGTAACCGTCGTAA           | Q-PCR            | 144  | KJ508184      |
| <i>G6PD</i>     | GAGAAGCCTGCCTCAACCA                | GGATCGTCCAAGTAGCCAAGT            | Q-PCR            | 158  | KJ508185      |
| <i>FAS</i>      | CATCATCACTGGAGGTCTTGGA             | TACGAATGCCTGATCTGGAAGT           | Q-PCR            | 104  | KJ508188      |
| <i>β-Actin</i>  | GTGCGTGACATCAAGGAGAAG              | CGAGGAAGGATGGCTGGAA              | Q-PCR            | 178  | KP893561      |
| <i>18s rRNA</i> | TCATTCCGATAACGAACGAG               | GGACATCTAAGGGCATACA              | Q-PCR            | 143  | KP893562      |
| <i>GAPDH</i>    | AAAGTCATCCCCGAGCTCAA               | CTTCAGACGCAGCCTTCATC             | Q-PCR            | 148  | KP893555      |
| <i>HPRT</i>     | CCTCTCCGACTCACAGCTAG               | GTCGCCATCTTCACCTCAAC             | Q-PCR            | 136  | KP893556      |
| <i>RPL7</i>     | GCGCCAGATCTTCAATGGAG               | CTCATTCTGCCATGACCACG             | Q-PCR            | 147  | KP893557      |
| <i>TBP</i>      | AGTCCCATGATGCCCTATGG               | GCAACAGCTTGGGAATGGAA             | Q-PCR            | 179  | KP893559      |
| <i>TUBA</i>     | CACTTCCCTCTTGCCACCTA               | ACGGTACAGGAGACAACAGG             | Q-PCR            | 165  | KP893558      |
| <i>UBCE</i>     | GCCCCTGGAAGGATTCAAAA               | AAGGCAGGTGGAGAGTATGG             | Q-PCR            | 156  | KP893560      |
